# Supplementary material
Source: Springer Nature journal article supplement (https://www.springermedizin.de/resource/supplementary/12967_2013_1584_MOESM2_ESM.pdf/9574390)

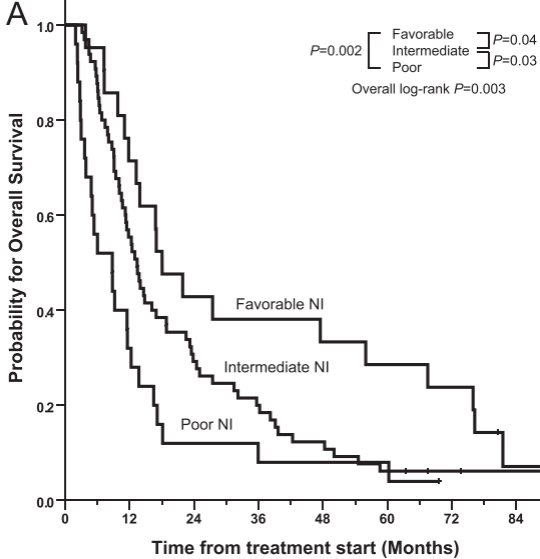

No. at risk

|              |    |    |    |    |   |   |   |   |
|--------------|----|----|----|----|---|---|---|---|
| Favorable    | 21 | 15 | 9  | 8  | 7 | 6 | 5 | 1 |
| Intermediate | 65 | 36 | 19 | 13 | 8 | 4 | 2 | 1 |
| Poor         | 25 | 8  | 3  | 2  | 2 | 2 | 0 | 0 |

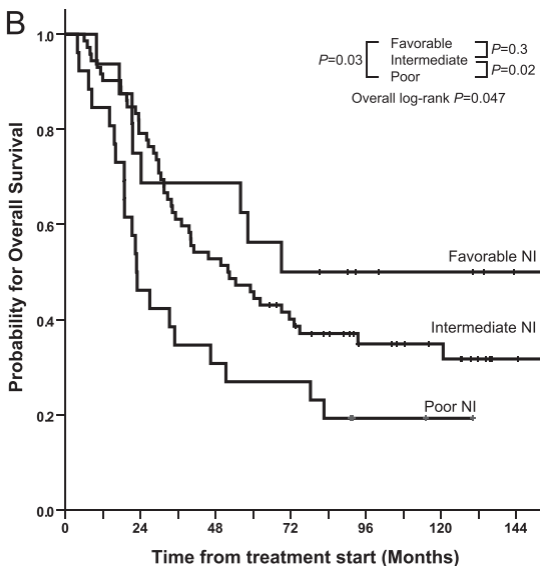

No. at risk

|              |    |    |    |    |    |    |   |
|--------------|----|----|----|----|----|----|---|
| Favorable    | 16 | 12 | 11 | 8  | 5  | 4  | 1 |
| Intermediate | 72 | 57 | 38 | 27 | 15 | 11 | 3 |
| Poor         | 26 | 12 | 8  | 7  | 2  | 1  | 0 |

Supplement: MOESM2 [file 9574390]
